# Supplementary material for: Coastal livelihood transitions under globalization with implications for trans-ecosystem interactions
Source: PubMed Central journal article supplement (PMC5659644; doi:10.1371/journal.pone.0186683), 2017-10-27
Supplement: pone.0186683.s001.pdf [file pone.0186683.s001.pdf]

**From:** Peebles epeebles@verizon.net   
**Subject:** RE: Fish drawings  
**Date:** August 16, 2017 at 9:10 AM  
**To:** Kramer, Daniel dbk@msu.edu

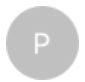

Daniel,

I will send over the images via my Hightail account shortly. With regard to the croaker name, I can't allow it to be mislabeled as a different species (make me look bad as an illustrator), but I suppose it would be okay to call it *Micropogonias spp.* Can you tell me the approximate reproduction size of the images so I know what size files to send to you?

Diane Rome Peebles Fine Art, LLC  
P. O. Box 12855  
St. Petersburg, FL 33713  
(727) 321-5951

[www.dianepeebles.com](http://www.dianepeebles.com)

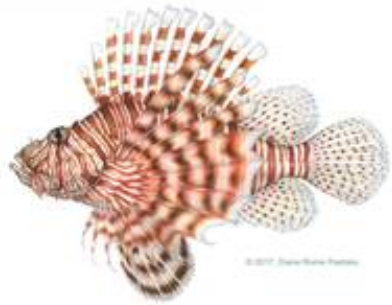

---

**From:** Kramer, Daniel [mailto:dbk@msu.edu]  
**Sent:** Friday, August 11, 2017 9:52 AM  
**To:** Peebles  
**Subject:** Re: Fish drawings

Dear Diane,

Thanks so much. Below are the illustrations we'd like to use. I am not sure how this works. Do you send me them without the watermark?

The Atlantic croaker is most similar to the species we encounter in Nicaragua, the Whitemouth Croaker (*Micropogonias furnieri*). Would you mind if in our paper we label your image of the Atlantic Croaker either Whitemouth Croaker (*Micropogonias furnieri*) or *Micropogonias spp.*?

By the way, your illustrations are really beautiful.

Dan

Gafftopsail Catfish (*Bagre marinus*)

Atlantic Croaker (*Micropogonias undulatus*)

Mojarras (*Eugerres plumieri*)

Weakfish (*Cynoscion regalis*)

Common Snook (*Centropomus undecimalis*)

Creville Jack (*Caranx hippos*)

## Daniel Boyd Kramer

Michigan State University

842 Chestnut Road | 365 North Case Hall | East Lansing, MI 48824

517.432.2199 | [dbk@msu.edu](mailto:dbk@msu.edu) | [www.danielboydkramer.com](http://www.danielboydkramer.com)

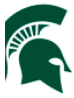

James Madison College

Department of Fisheries & Wildlife | College of Agriculture and Natural Reso

MICHIGAN STATE UNIVERSITY

On Aug 11, 2017, at 6:10 AM, Peebles <[epeebles@verizon.net](mailto:epeebles@verizon.net)> wrote:

Dan,

Yes, that is fine to use the fish illustrations with the standard licensing fees waived for the purpose you described. Where appropriate, please include the credit information, © Diane Rome Peebles.

Diane Rome Peebles Fine Art, LLC  
P. O. Box 12855  
St. Petersburg, FL 33713  
(727) 321-5951

[www.dianepeebles.com](http://www.dianepeebles.com)

<image001.jpg>

---

**From:** Kramer, Daniel [<mailto:dbk@msu.edu>]

**Sent:** Thursday, August 10, 2017 3:48 PM

**To:** [epeebles@verizon.net](mailto:epeebles@verizon.net)

**Subject:** Fish drawings

Dear Ms. Peebles,

I am writing to request permission to use some of your images in an academic manuscript. I have attached the proposed figure in which I plan to use the images so you understand their use.

Below is the request that the journal advises I send to you.

"I request permission for the open access journal PLOS ONE to publish XXX

I request permission for the open-access journal FLOES ONE to publish XXX under the Creative Commons Attribution License (CCAL) CC BY 4.0 (<http://creativecommons.org/licenses/by/4.0/>). Please be aware that this license allows unrestricted use and distribution, even commercially, by third parties. Please reply and provide explicit written permission to publish XXX under a CC BY license.”

I am interested in the following: mojarra, weakfish, snook, catfish, black drum (croaker), jack, white shrimp, and red shrimp. I am not sure whether you have images of all of these but I know there are at least two that you do (mojarra and black drum).

If you agree in principle, I can look at your web site and find the images I would like to use.

Sincerely,

Dan

<image002.png>

**Daniel Boyd Kramer**  
Michigan State University  
842 Chestnut Road | 365 North Case Hall | East Lansing, MI 48824  
517.432.2199 | [dbk@msu.edu](mailto:dbk@msu.edu) | [www.danielboydkramer.com](http://www.danielboydkramer.com)  
<image003.jpg>

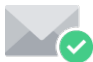

Virus-free. [www.avg.com](http://www.avg.com)
